# Supplementary material
Source: HighWire-hosted journal article supplement (https://erj.ersjournals.com/content/55/3/2000079)
Supplement: inline-supplementary-material-1 [file inline-supplementary-material-1.pdf]

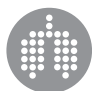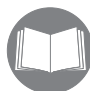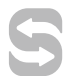

SHAREABLE PDF

# The CICERO (Collaboration In COPD Exacerbations) Clinical Research Collaboration

Wim Janssens <sup>1</sup> and Mona Bafadhel<sup>2</sup>, Chairs of the CICERO Clinical Research Collaboration<sup>3</sup>

**Affiliations:** <sup>1</sup>Clinical Dept of Respiratory Diseases, UZ Leuven, BREATHE department CHROMETA, KU Leuven, Leuven, Belgium. <sup>2</sup>Respiratory Medicine Unit, Nuffield Dept of Medicine, University of Oxford, Oxford, UK. <sup>3</sup>A list of CICERO Clinical Research Collaboration members can be found in the acknowledgements section.

**Correspondence:** Mona Bafadhel, Nuffield Dept of Medicine, University of Oxford, NDM Research Building, Old Road Campus, Oxford, OX3 7FZ, UK. E-mail: mona.bafadhel@ndm.ox.ac.uk

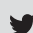

@ERSpublications

**CICERO is a new Clinical Research Collaboration (CRC), studying severe exacerbations of COPD**  
<http://bit.ly/30K2BDi>

**Cite this article as:** Janssens W, Bafadhel M. The CICERO (Collaboration In COPD Exacerbations) Clinical Research Collaboration. *Eur Respir J* 2020; 55: 2000079 [<https://doi.org/10.1183/13993003.00079-2020>].

This single-page version can be shared freely online.

Marcus Tullius Cicero was a famous Roman (b. 106 BC) with enterprise in politics, philosophy and oration. Cicero was recognised as a forefather of modernising Latin and Latin *prose* and for providing the building blocks of many European languages. His most famous of works *De Officiis* was the second book to be printed in Europe after the Gutenberg Bible (c1455), establishing his relevance to both the European and global community. One of Cicero's most famous quotes is "*Quousque tandem abutere, patientia nostra*" said to Lucius Sergius Catilina (b. 108 BC) upon exposure of the plot to overthrow Rome (c. 63 BC). "*When, do you mean to stop abusing our patience*", the translation of Cicero's most famous quote, is highly relevant when pointing to the necessity and urgency of this new Clinical Research Collaboration (CRC).
